# Supplementary material
Source: PubMed Central journal article supplement (PMC5936630)
Supplement: NIHMS954763-supplement-Supplement.pdf [file NIHMS954763-supplement-Supplement.pdf]

**Supporting information for:**

**Cytochrome aa<sub>3</sub> oxygen reductase utilizes the**

**tunnel observed in the crystal structures to**

**deliver O<sub>2</sub> for catalysis**

Paween Mahinthichaichan,<sup>‡</sup> Robert B. Gennis,<sup>\*,§</sup> and Emad Tajkhorshid<sup>\*,‡</sup>

*<sup>‡</sup>Department of Biochemistry, NIH Center for Macromolecular Modeling and  
Bioinformatics, Beckman Institute for Advanced Science and Technology, University of  
Illinois at Urbana-Champaign, Urbana, IL 61801, U.S.A.*

*<sup>§</sup>Department of Biochemistry, University of Illinois at Urbana-Champaign, Urbana, IL  
61801, U.S.A.*

E-mail: r-gennis@illinois.edu; emad@life.illinois.edu

Phone: +1 217 3339075; +1 217 2446914

**Running header**

O<sub>2</sub> delivery pathway in cytochrome aa<sub>3</sub>

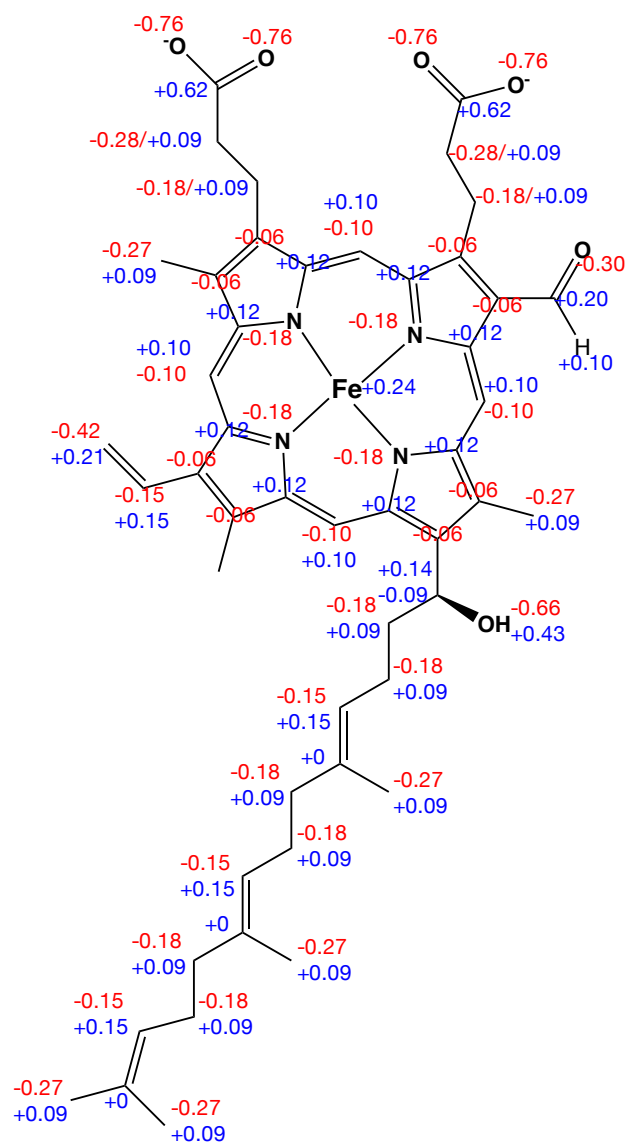

Figure S1: Charge distributions for heme *a/a*<sub>3</sub> derived from analogy.

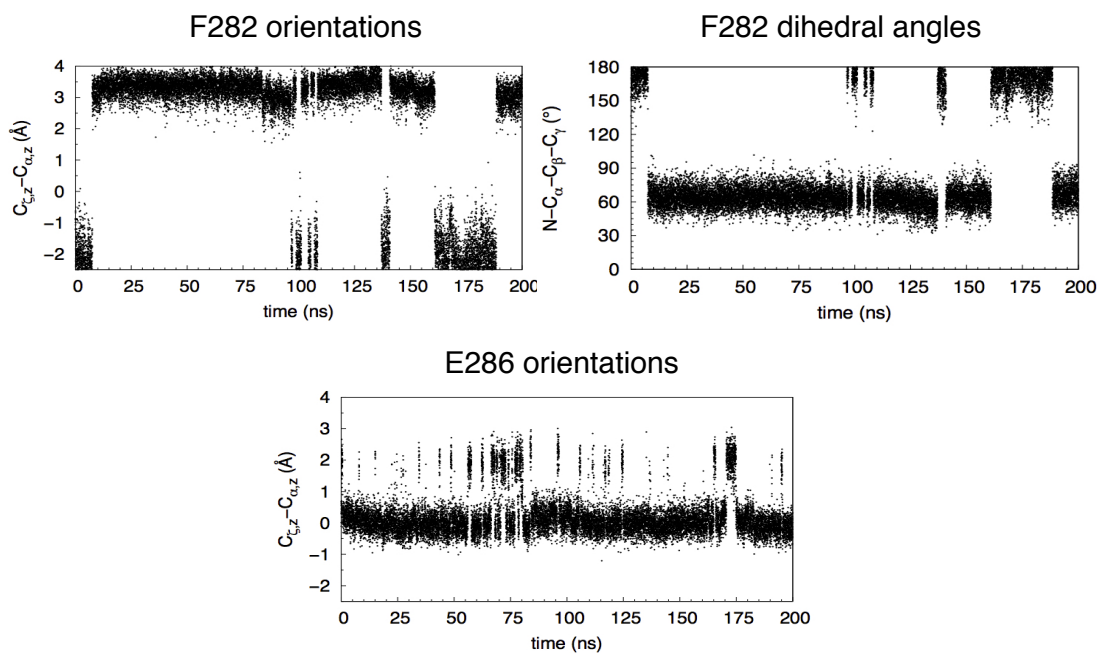

Figure S2: Conformational dynamics of residues F282 and E286. The sidechain of F282 is oriented into the  $O_2$  pathway at  $N-C_{\alpha}-C_{\beta}-C_{\gamma}$  of  $\sim 180^\circ$  and  $C_{\alpha,z}-C_{\alpha,z}$  of  $\sim 2$  Å. The sidechain of E286 is oriented into the  $O_2$  pathway or in the “up” conformation at  $C_{\alpha,z}-C_{\alpha,z}$  of  $\sim 2$  Å. These configurations result in the constriction of  $O_2$  migration across the bottleneck of the pathway.

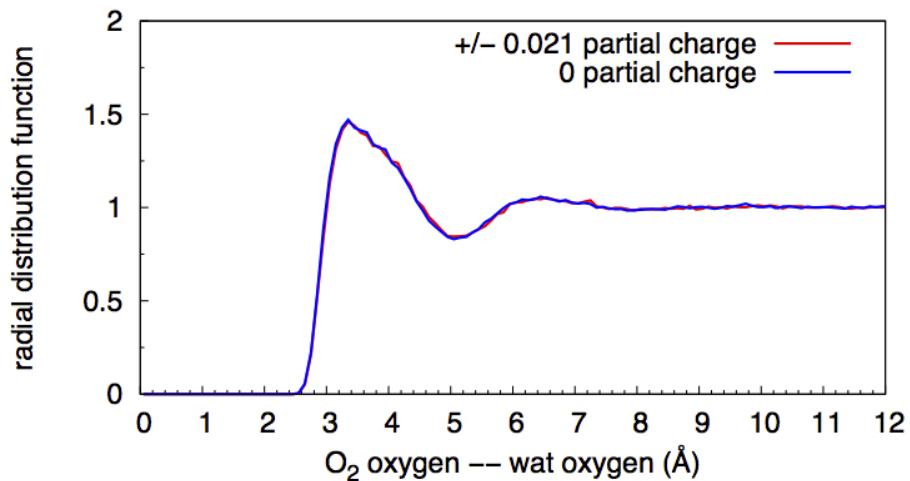

Figure S3: Radial distribution function (RDF) profiles describing contact distance between oxygen atoms of  $O_2$  and water molecules. The profiles were calculated from 5-ns MD simulations in which an  $O_2$  molecule is solvated in a  $30 \times 30 \times 30 \text{ \AA}^3$  water box. The oxygen atoms of the slightly charged  $O_2$  model carry the partial charges of  $\pm 0.021$ . The ones for the apolar model carry the partial charges of 0. Similar RDF profiles indicate negligible effects on  $O_2$ -water interactions by the introduction of such small polarizations.

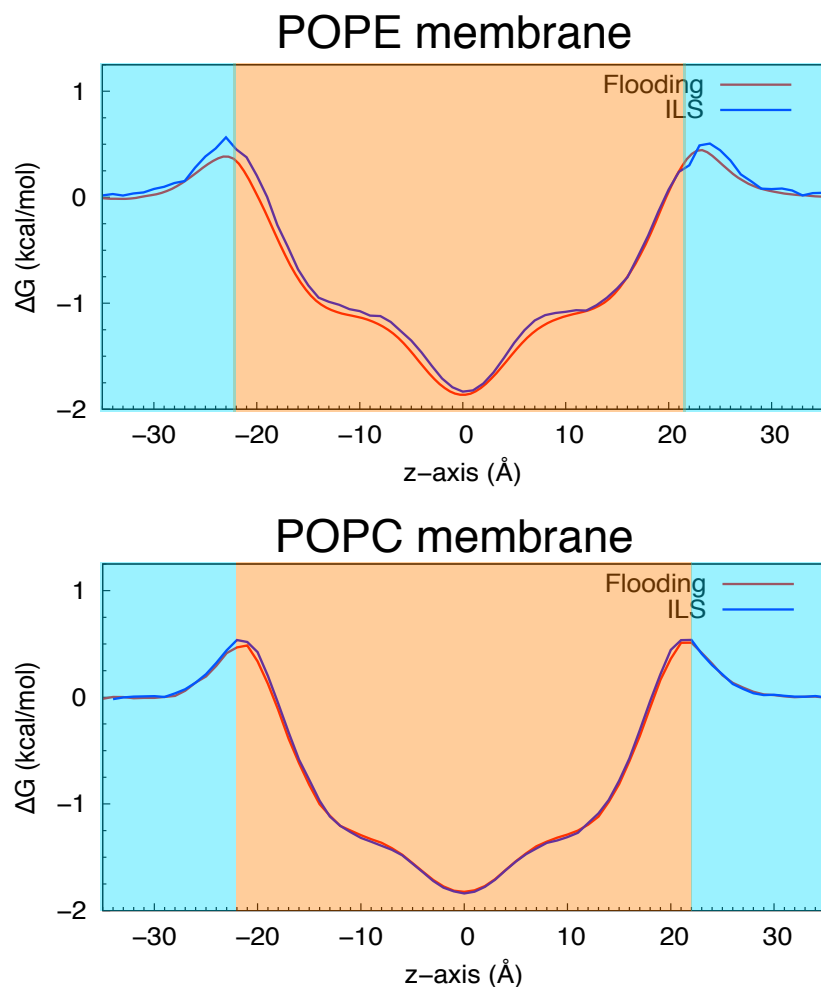

Figure S4: Partitioning free energy profiles of  $O_2$  in membrane (shaded orange) and in the aqueous solution (shaded cyan). The profiles of the flooding simulations were obtained from 200-ns simulations in which 125  $O_2$  molecules are explicitly incorporated. The slightly charged model of  $O_2$  was used in the flooding simulations. Since no electrostatic terms are included in ILS, the oxygen atoms in the calculations carry the partial charges of 0. These calculated profiles are in close agreement with those reported in other studies, such as by Ghysels et al<sup>1</sup> who used the apolar model, as well as by Hub and de Groot<sup>2</sup> who introduced a quadrupole to the simulated  $O_2$  molecules.

Table S1: Solvation free energy of O<sub>2</sub> from the models used in the present study

| O <sub>2</sub> model | Charges on the oxygen atoms | $\Delta G_{sol}$ (kcal/mol) |
|----------------------|-----------------------------|-----------------------------|
| Slightly charged     | -0.021/+0.021               | 2.06±0.05                   |
| Apolar               | 0/0                         | 2.03±0.05                   |

We note that these calculated  $\Delta G_{sol}$  values are also in agreement with the values of 2.05 kcal/mol reported by Victor et al<sup>3</sup>, who used the apolar model.

## References

- (1) Ghysels, A., Venable, R.M., Pastor, R.W., Hummer, G. (2017) Position-dependent diffusion tensors in anisotropic media from simulation: Oxygen transport in and through membranes. *Journal of Chemical Theory and Computation*, 13, 2962-2976.
- (2) Hub, J.S., de Groot, B.L. (2008) Mechanism of selectivity in aquaporins and aquaglyceroporins. *Proc. Natl. Acad. Sci. U.S.A.*, 105, 1198-1203.
- (3) Victor, B.L., Baptista A.M., Soares, C.M. (2009) Dioxygen and nitric oxide pathways and affinity to the catalytic site of rubredoxin:oxygen oxidoreductase from *Desulfovibrio gigas*, *J. Biol. Inorg. Chem.*, 14, 852-862.
